# Supplementary material for: Gentrius: identifying equally scoring trees in phylogenomics with incomplete data
Source: bioRxiv or medRxiv preprint supplement (doi:10.1101/2023.01.19.524678), 2023-11-21
Supplement: Supplementary file [file media-6.pdf]

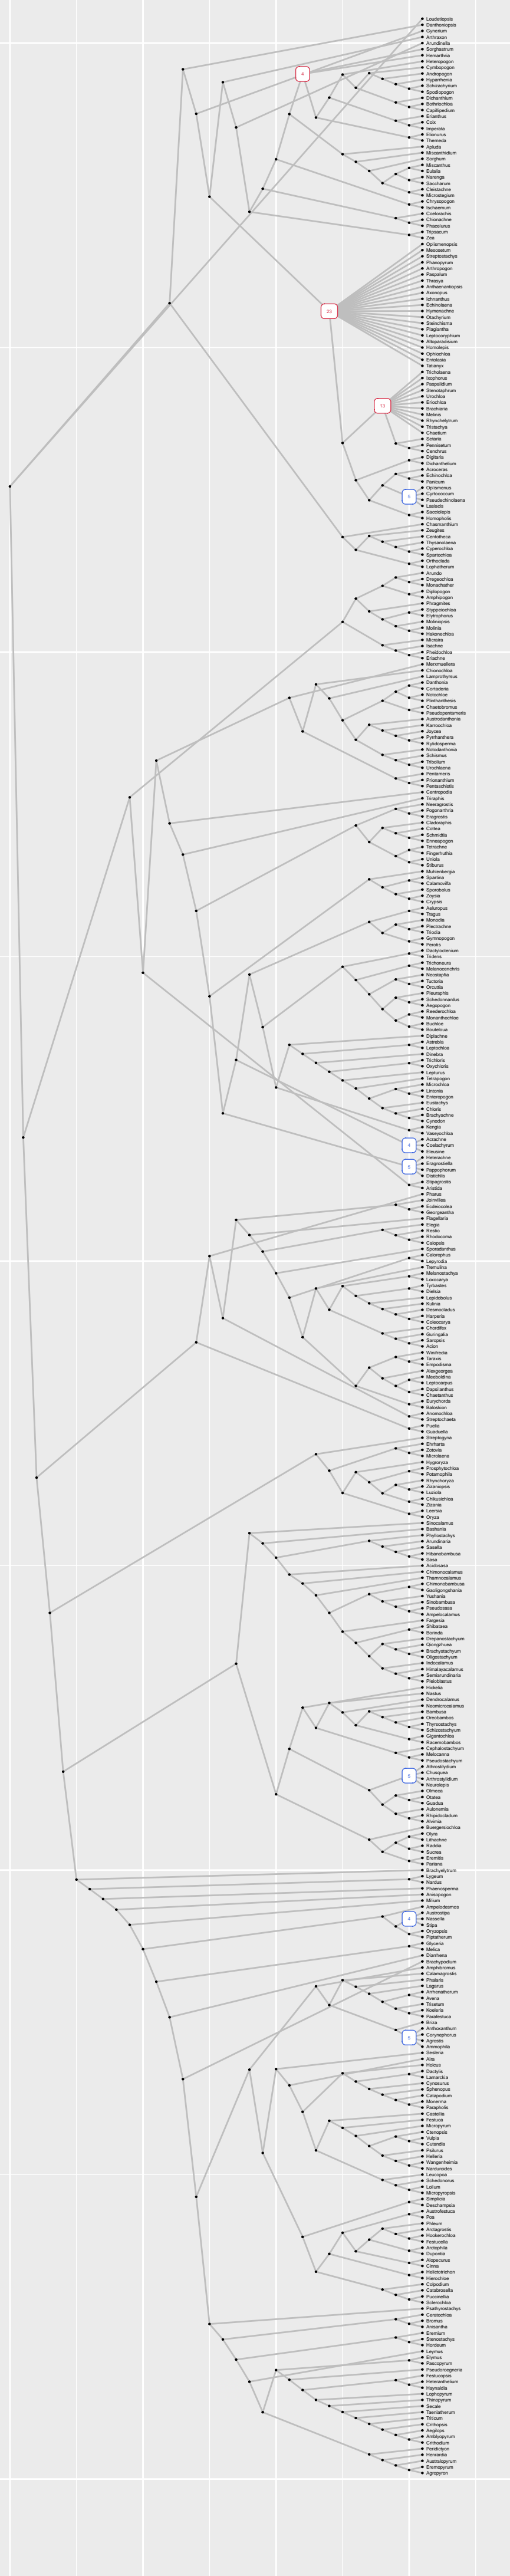

- Loudetia
- Danthoniopsis
- Gynerium
- Arthraxon
- Arundinella
- Sorghastrum
- Heteropogon
- Cymbopogon
- Antheropogon
- Hygrastria
- Schizachyrium
- Spodiopogon
- Dichanthium
- Bothriochloa
- Capillipedium
- Zizania
- Coix
- Imperata
- Saccharum
- Themeda
- Aeluropus
- Miscanthidium
- Sorghum
- Miscanthus
- Eulalia
- Narenga
- Saccharum
- Cleistachne
- Chrysopogon
- Ischaemum
- Dichanthium
- Chionachne
- Phacelurus
- Tripsacum
- Zea
- Oplismenus
- Mioscotium
- Streptostachys
- Phanopyrum
- Anthropogon
- Thrasya
- Anabaenariopsis
- Anabaenaria
- Ichnanthus
- Echinochaena
- Hymenachne
- Otachyrium
- Stenochloa
- Alopapadium
- Homalium
- Ophiocloa
- Eriolaia
- Talaris
- Ticholaena
- Isophorus
- Paspalum
- Urochloa
- Eriochloa
- Bracharia
- Melinis
- Rhyngelytrum
- Trinachya
- Chaetium
- Seraria
- Pennisetum
- Cenchrus
- Digitaria
- Dichanthium
- Acrostichum
- Echinochloa
- Panicum
- Oplismenus
- Cynococcum
- Pseudochloa
- Saccolipis
- Homalium
- Chionanthum
- Zeuglites
- Centotheca
- Thyrsolaena
- Cyperochloa
- Spartochloa
- Orthocladia
- Lophanthus
- Arundo
- Digeochloa
- Calamagrostis
- Diplopogon
- Amphipogon
- Phragmites
- Styppeochloa
- Elytrophus
- Molinopsis
- Molinia
- Hakonochloa
- Micrantha
- Isachne
- Phaeochloa
- Erachne
- Scaevola
- Chionochloa
- Lamprolytrum
- Danthonia
- Cortaderia
- Notochloa
- Pseudanthus
- Chaetobromus
- Pseudopentameris
- Austrodanthonia
- Karroochloa
- Joycea
- Pyralanthus
- Rynchosperma
- Notodanthonia
- Schismus
- Tiliaria
- Urochloa
- Pentameris
- Pycnanthemum
- Pentaschistis
- Centropodia
- Triphragma
- Neeragrostis
- Pogonarthria
- Eragrostis
- Cladostylis
- Cottea
- Schmidtia
- Archipogon
- Tetrachne
- Fingertuhia
- Urochloa
- Siburus
- Muhlenbergia
- Sparina
- Calamovilla
- Sporobolus
- Zoopsis
- Crypsis
- Aeluropus
- Tagus
- Machya
- Plectrachne
- Triodia
- Gymnopogon
- Perotis
- Dactyloctenium
- Triticum
- Tichoneura
- Melanocentris
- Neoscepterum
- Tuctoria
- Orcuttia
- Pycnanthemum
- Schedonardus
- Aegopogon
- Radermachia
- Monochloa
- Buchloe
- Bouteloua
- Diphysa
- Astrebla
- Leptochloa
- Crotalaria
- Tichochloa
- Oxychloris
- Lepidobolus
- Tetrapogon
- Microchloa
- Lintonia
- Enteropogon
- Eustachys
- Chloris
- Brachyachne
- Cynodon
- Kengia
- Vaseyochloa
- Acrachne
- Coelachyrum
- Elytrophus
- Heterachne
- Eragrostella
- Pappophorum
- Dactyloctenium
- Stipagrostis
- Aristida
- Pharus
- Joinvillea
- Eriochloa
- Elytrophus
- Rhodocoma
- Calopsis
- Sporobolus
- Calamagrostis
- Lepidobolus
- Melanostachya
- Loxocarya
- Typhlochaeta
- Dielsia
- Lepidobolus
- Kulnia
- Desmodium
- Harperia
- Coleocarya
- Cortaderia
- Guringalia
- Saropsis
- Acon
- Winifredia
- Taraxis
- Empodisma
- Aleochara
- Meibomia
- Lepidocarpus
- Indocalamus
- Chaetanthus
- Eurychorda
- Bactocoma
- Anomochloa
- Streptochaeta
- Pusia
- Guadalupea
- Streptogynia
- Enhartha
- Zostera
- Microchloa
- Hygronria
- Pseudochloa
- Potanophila
- Rhyngelytrum
- Zizania
- Luziola
- Chusquea
- Zizania
- Leersia
- Oriza
- Sirocalamus
- Bashania
- Phyllostachys
- Aristida
- Sasa
- Sasa
- Hbanobambusa
- Sasa
- Aclidiasa
- Chimonocalamus
- Thamnocalamus
- Chimonobambusa
- Gaoligongshania
- Yuhania
- Pseudosasa
- Amphicalamus
- Fargesia
- Shibataea
- Borinda
- Dipsacostachyum
- Qionghua
- Brachystachyum
- Diplopogon
- Indocalamus
- Himalayacalamus
- Semiarundinaria
- Pseudosasa
- Hickelia
- Nastus
- Dendrocalamus
- Neomicrocalamus
- Bambusa
- Oryzopsis
- Thyrsostachys
- Schizostachyum
- Gigantochloa
- Racemobambos
- Cephalostachyum
- Melicope
- Pseudostachyum
- Athrostylium
- Chusquea
- Anthrostylium
- Neurolepis
- Omeca
- Oryza
- Guadua
- Aulonemia
- Rhipidoloma
- Anemia
- Buergersiichloa
- Oryza
- Litachne
- Raddia
- Sucrea
- Eremis
- Pariana
- Brachyelytrum
- Lygurus
- Nardus
- Phaeosperma
- Antheropogon
- Milium
- Arpedodesmos
- Austrosipha
- Nassella
- Stipa
- Oryzopsis
- Piptatherum
- Glyceria
- Melica
- Diarrhena
- Brachypodium
- Amphibromus
- Calamagrostis
- Phalaris
- Lagurus
- Antheratherum
- Avena
- Trisetum
- Koeleria
- Paralestua
- Briza
- Cynodactylon
- Agrostis
- Ammophila
- Scirpus
- Aira
- Holcus
- Dactylis
- Lamarckia
- Cynosurus
- Sporobolus
- Catapodium
- Moneris
- Piptatherum
- Castella
- Festuca
- Microgynium
- Ctenopogon
- Vulpia
- Cutandia
- Pylaeus
- Helleria
- Wangenheimeria
- Nastus
- Leucopoa
- Schedonorus
- Lulium
- Microgynium
- Siphocia
- Dactyloctenium
- Austrosetica
- Poa
- Phleum
- Archipogon
- Hookerchloa
- Festucella
- Antheropogon
- Dupontia
- Alpecurus
- Helictotrichon
- Hierochloa
- Calamagrostis
- Calamagrostis
- Puccinellia
- Schizanthus
- Pseudostachys
- Ceratocloa
- Bromus
- Antheropogon
- Eremium
- Stenostachys
- Holcus
- Leymus
- Elymus
- Austrosetica
- Pseudoregneria
- Festucella
- Heteranthus
- Haynaldia
- Lophopyrum
- Trinopogon
- Secale
- Tarentherum
- Iticum
- Lygurus
- Aeglops
- Antheropogon
- Cynodon
- Peridocyron
- Hernandia
- Austrosetica
- Eremopyrum
- Agropyron

S: ~15M

R: 90%

iB: 360

mN: 9
